# Supplementary material for: Nafion/Surface Modified Ceria Hybrid Membranes for Fuel Cell Application
Source: MDPI journal article supplement (doi:10.3390/polym13152513), 2021-07-30
Supplement: s1 [file s1]

## Supplementary information

(for article "Nafion/surface modified ceria hybrid membranes for proton exchange fuel cell application" by Polina A. Yurova, Viktoria R. Malakhova, Ekaterina V. Gerasimova, Irina A. Stenina and Andrey B. Yaroslavl'tsev)

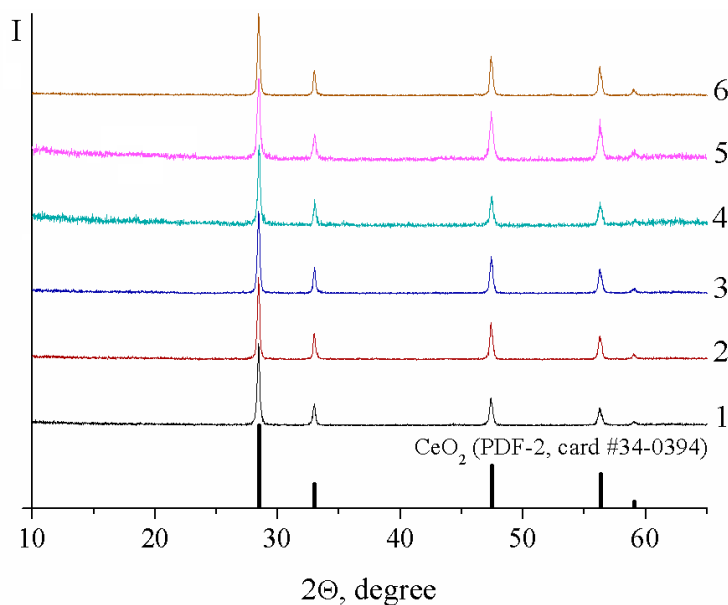

**Figure S1.** X-ray diffraction patterns of residues of the NC3 (1), NC3\_1S (2), NC3\_1P (3), NC4 (4), NC4\_1S (5), and NC4\_1P (6) hybrid membranes after annealing at 800 °C.

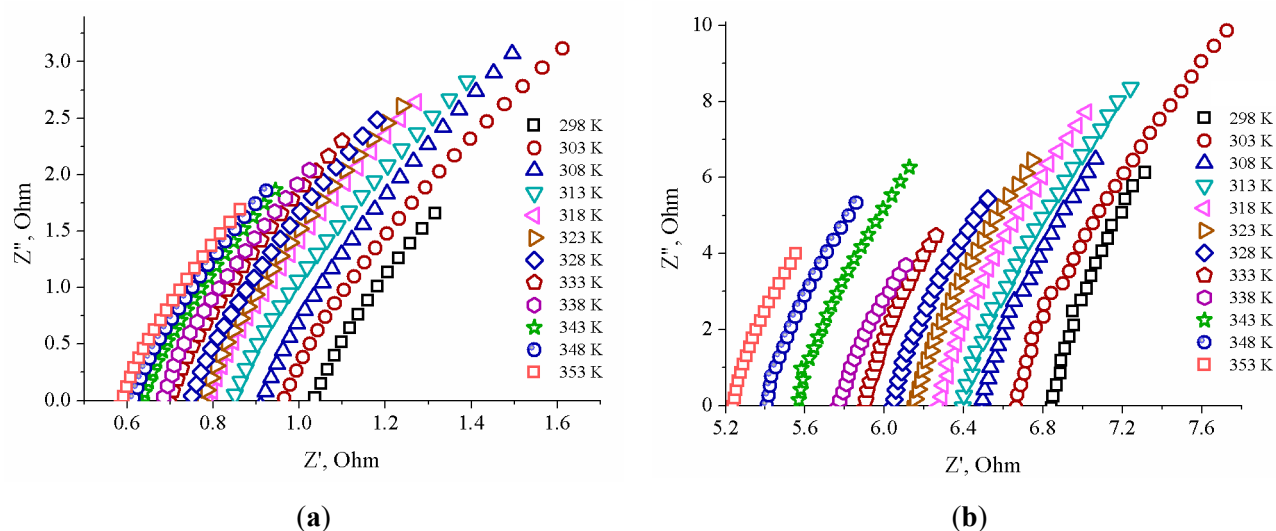

**Figure S2.** Nyquist plots of the NC4(S) composite membrane recorded at different temperatures in contact with water (a) and 30% RH (b).

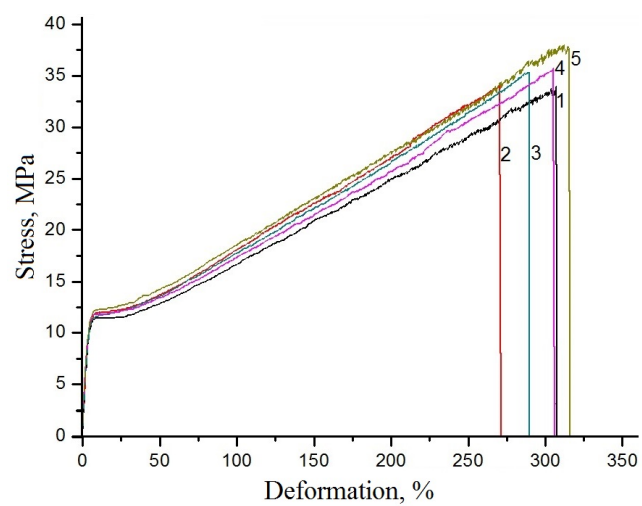

**Figure S3.** Stress-strain responses of the pristine Nafion-117 (1) and the NC3 (2), NC4\_1P (3), NC4(S) (4), and NC4(NS) (5) hybrid membranes.
